# Supplementary material for: Synthesis, characterization, and theoretical studies of the photovoltaic properties of novel reactive azonitrobenzaldehyde derivatives
Source: PubMed Central journal article supplement (PMC9038037; doi:10.1039/d1ra05075c), 2021-09-09
Supplement: RA-011-D1RA05075C-s001.pdf [file RA-011-D1RA05075C-s001.pdf]

## Electronic Supporting Information for Synthesis, Characterization, DFT, and TD-DFT Studies of the Photovoltaic Properties of Novel Reactive Azonitrobenzaldehyde derivatives

Hitler Louis<sup>a,b\*</sup>, Izubundu B. Onyebuanyi<sup>a,b</sup>, Joseph O. Odey<sup>a,b</sup>, Azuaga T. Igbalagh<sup>c\*</sup> MaryJane T. Mbonu<sup>a,b</sup>, Ededet A. Eno<sup>a,b</sup>, Anthony M.S. Pembere<sup>d</sup>, and Ofiong E. Offiong<sup>b</sup>.

<sup>a</sup>Computational and Bio-Simulation Research Group, Department of Pure and Applied Chemistry, University of Calabar, Calabar, Nigeria

<sup>b</sup>Department of Pure and Applied Chemistry, Faculty of Physical Sciences, University of Calabar, Calabar, Nigeria

<sup>c</sup>Department of Chemical Sciences, Federal University of Wukari, Wukari, Nigeria

<sup>d</sup>Department of Physical Sciences, Jaramogi Oginga Odinga University of Science and Technology, Bondo, Kenya

**\*\*Corresponding author's email: [louismuzong@gmail.com](mailto:louismuzong@gmail.com); [shies4me@gmail.com](mailto:shies4me@gmail.com)**

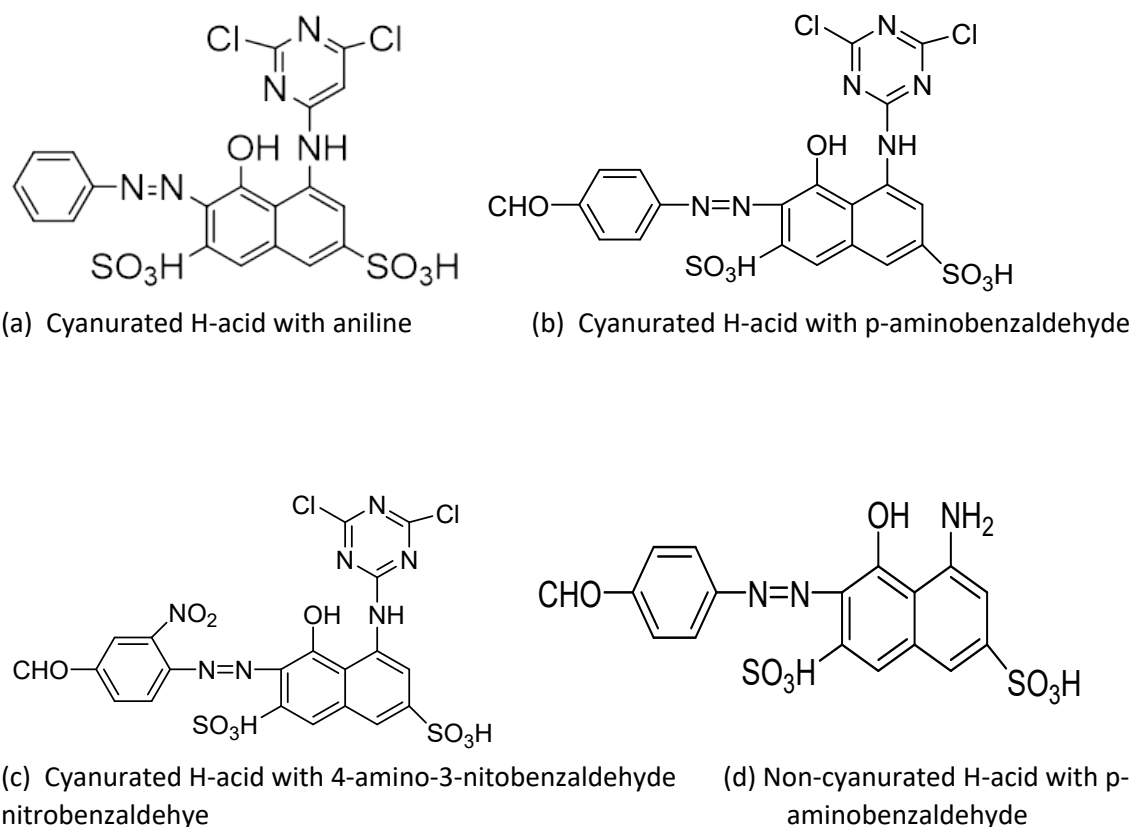

**Figure S1. The molecular structures of the synthesized dyes A, B, C and D.**

FTIR ANALYSIS RESULT NARICT,ZARIA

FTIR-8400S FOURIER TRANSFORM INFRARED SPECTROPHOTOMETER

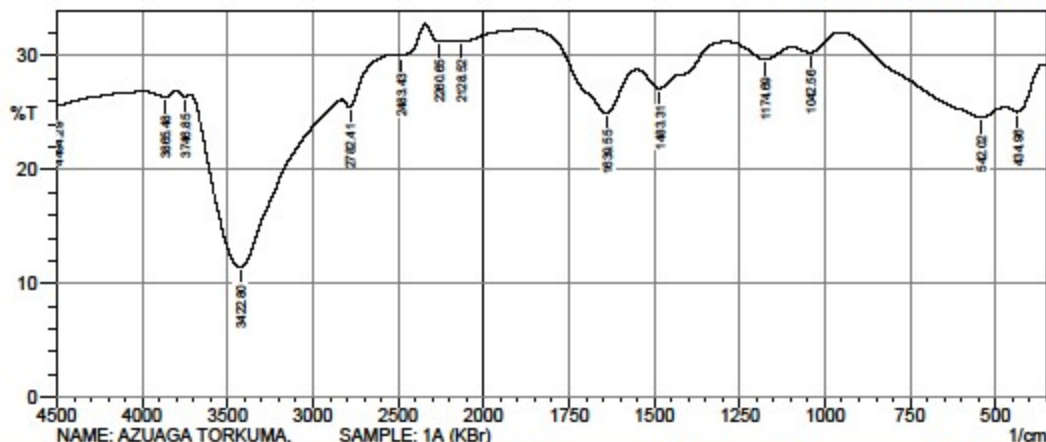

NAME: AZUAGA TORKUMA, SAMPLE: 1A (KBr)

| Peak | Intensity | Corr. Intensity | Base (H) | Base (L) | Area    | Corr. Area |
|------|-----------|-----------------|----------|----------|---------|------------|
| 1    | 434.96    | 25.071          | 1.68     | 472.58   | 359.74  | 65.075     |
| 2    | 542.02    | 24.594          | 1.829    | 953.83   | 473.54  | 269.745    |
| 3    | 1042.56   | 30.267          | 0.978    | 1093.67  | 954.8   | 70.699     |
| 4    | 1174.69   | 29.676          | 1.3      | 1287.53  | 1094.64 | 99.714     |
| 5    | 1483.31   | 27.149          | 2.26     | 1551.78  | 1288.49 | 141.688    |
| 6    | 1639.55   | 24.967          | 4.758    | 1874.87  | 1552.75 | 175.252    |
| 7    | 2128.52   | 31.233          | 0.305    | 2201.82  | 1875.84 | 162.719    |
| 8    | 2260.65   | 31.243          | 0.686    | 2340.7   | 2202.78 | 68.958     |
| 9    | 2483.43   | 29.967          | 0.867    | 2536.48  | 2341.66 | 99.951     |
| 10   | 2782.41   | 25.495          | 1.326    | 2831.6   | 2537.44 | 161.945    |
| 11   | 3422.8    | 11.453          | 14.957   | 3716.95  | 2832.56 | 642.711    |
| 12   | 3746.85   | 26.401          | 0.275    | 3798.93  | 3717.92 | 46.611     |
| 13   | 3865.48   | 26.376          | 0.554    | 3994.71  | 3799.89 | 111.877    |
| 14   | 4494.29   | 25.714          | 0.014    | 4500.08  | 3995.67 | 291.753    |

Comment;

NAME: AZUAGA TORKUMA, SAMPLE: 1A (KBr)

User; Administrator

No. of Scans;  
Date/Time; 7/24/2015 9:40:36 AM

Resolution;

FTIR ANALYSIS RESULT NARICT,ZARIA

FTIR-8400S FOURIER TRANSFORM INFRARED SPECTROPHOTOMETER

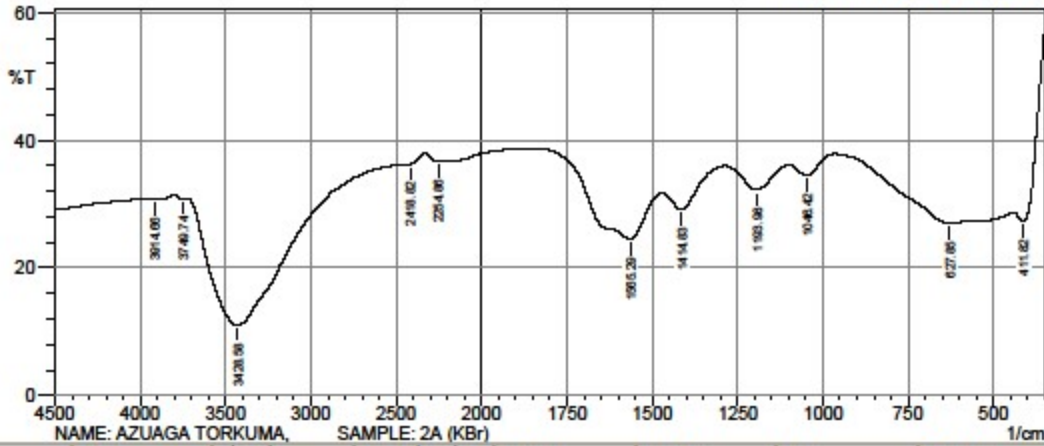

| Peak | Intensity | Corr. Intensity | Base (H) | Base (L) | Area    | Corr. Area |
|------|-----------|-----------------|----------|----------|---------|------------|
| 1    | 411.82    | 27.314          | 11.297   | 443.64   | 43.924  | 7.319      |
| 2    | 627.85    | 26.995          | 4.931    | 966.37   | 267.187 | 16.119     |
| 3    | 1046.42   | 34.529          | 2.264    | 1099.46  | 967.33  | 1.635      |
| 4    | 1193.98   | 32.207          | 3.815    | 1288.49  | 1100.43 | 4.199      |
| 5    | 1414.83   | 29.193          | 3.896    | 1471.74  | 1289.46 | 3.751      |
| 6    | 1565.29   | 24.505          | 8.965    | 1859.44  | 1471.74 | 20.335     |
| 7    | 2254.86   | 36.669          | 1.431    | 2336.84  | 1865.23 | 4.74       |
| 8    | 2418.82   | 36.305          | 0.371    | 2441     | 2337.8  | 0.325      |
| 9    | 3428.58   | 11.061          | 21.096   | 3726.6   | 2441.96 | 800.146    |
| 10   | 3749.74   | 30.842          | 0.199    | 3805.68  | 3727.56 | 39.688     |
| 11   | 3914.66   | 30.704          | 0.37     | 3992.78  | 3806.64 | 95.014     |

Comment;

NAME: AZUAGA TORKUMA, SAMPLE: 2A (KBr)

User; Administrator

No. of Scans;

Date/Time; 7/24/2015 9:18:32 AM

Resolution;

FTIR ANALYSIS RESULT NARICT,ZARIA

FTIR-8400S FOURIER TRANSFORM INFRARED SPECTROPHOTOMETER

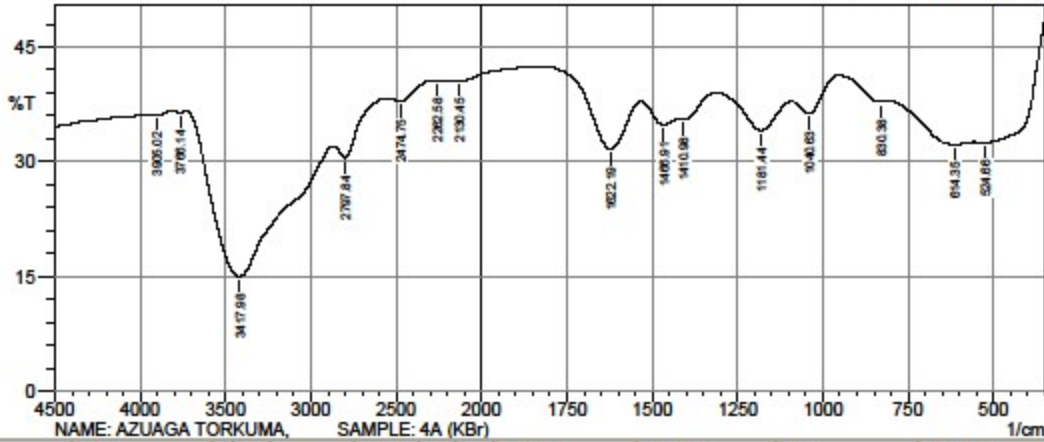

NAME: AZUAGA TORKUMA, SAMPLE: 4A (KBr)

| Peak | Intensity | Corr. Intensity | Base (H) | Base (L) | Area    | Corr. Area |         |
|------|-----------|-----------------|----------|----------|---------|------------|---------|
| 1    | 524.66    | 32.501          | 2.624    | 557.45   | 349.13  | 94.625     | 11.434  |
| 2    | 614.35    | 32.26           | 1.547    | 803.38   | 558.41  | 113.716    | 2.565   |
| 3    | 830.38    | 37.816          | 0.69     | 951.9    | 804.34  | 59.852     | 0.533   |
| 4    | 1040.63   | 36.326          | 2.791    | 1091.75  | 952.87  | 57.869     | 1.947   |
| 5    | 1181.44   | 34.045          | 4.282    | 1314.53  | 1092.71 | 96.992     | 4.88    |
| 6    | 1410.98   | 35.515          | 0.298    | 1419.66  | 1315.5  | 44.839     | 0.297   |
| 7    | 1466.91   | 34.826          | 1.693    | 1532.5   | 1420.62 | 49.865     | 1.162   |
| 8    | 1622.19   | 31.642          | 7.652    | 1830.51  | 1533.46 | 126.566    | 9.134   |
| 9    | 2130.45   | 40.554          | 0.422    | 2197.96  | 1831.47 | 140.36     | 0.707   |
| 10   | 2262.58   | 40.59           | 0.039    | 2297.3   | 2198.92 | 38.5       | 0.021   |
| 11   | 2474.75   | 37.877          | 1.158    | 2553.84  | 2298.26 | 104.642    | 1.475   |
| 12   | 2797.84   | 30.486          | 3.005    | 2871.14  | 2554.8  | 146.083    | 3.272   |
| 13   | 3417.98   | 15.013          | 19.951   | 3726.6   | 2872.1  | 539.854    | 142.202 |
| 14   | 3766.14   | 36.402          | 0.271    | 3813.4   | 3727.56 | 37.529     | 0.139   |
| 15   | 3905.02   | 36.114          | 0.194    | 3939.74  | 3814.36 | 55.165     | 0.2     |

Comment;

NAME: AZUAGA TORKUMA, SAMPLE: 4A (KBr)

User; Administrator

No. of Scans;  
Date/Time; 7/23/2015 3:40:56 PM  
Resolution;

## FTIR ANALYSIS RESULT NARICT,ZARIA

FTIR-8400S FOURIER TRANSFORM  
INFRARED SPECTROPHOTOMETER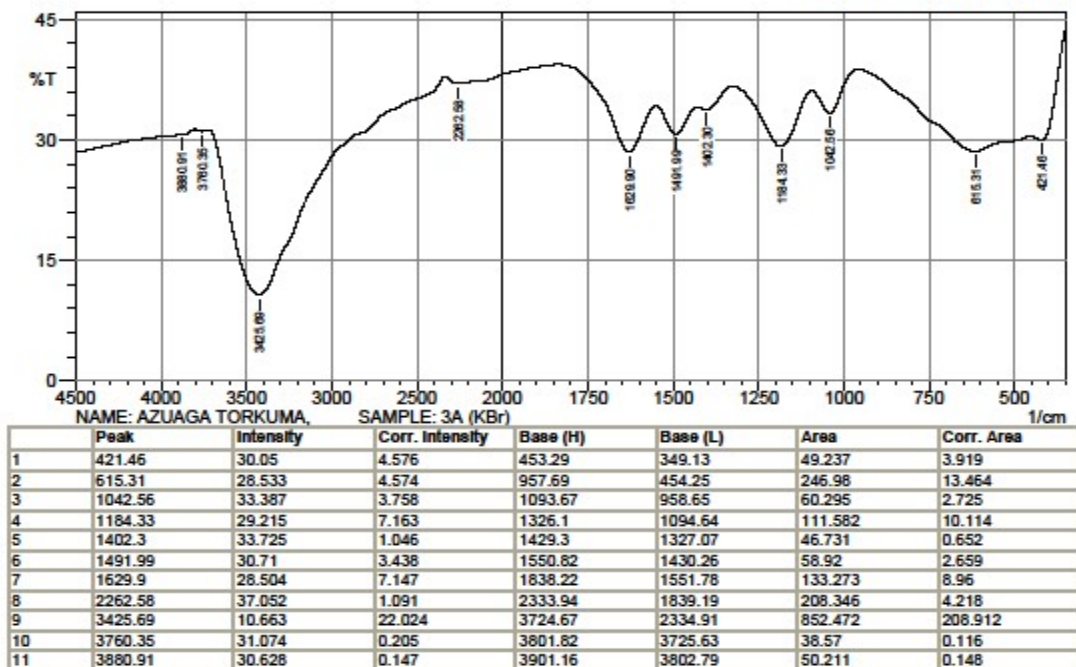

Comment;

NAME: AZUAGA TORKUMA, SAMPLE: 3A (KBr)

User; Administrator

No. of Scans;

Date/Time; 7/24/2015 9:12:49 AM

Resolution;

Figure S2: FT-IR of dyes A, B, C and D.

Hit# 5 Entry: 65143 Library: NIST05.LIB  
 SI: 90 Formula: C<sub>14</sub>H<sub>24</sub>O<sub>3</sub> CAS: 74685-36-2 MolWeight: 240 RefIndex: 2137  
 CompName: Oxacyclotetradecane-2,11-dione, 13-methyl-  $\text{\$}$  13-Methyloxacyclotetradecane-2,11-dione #  $\text{\$}$

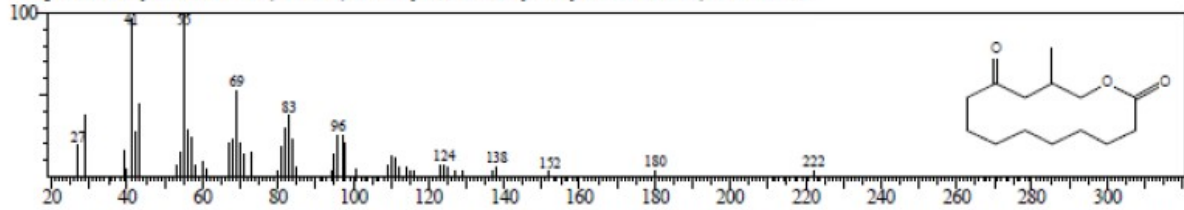

Hit# 5 Entry: 91895 Library: NIST05.LIB  
 SI: 91 Formula: C<sub>18</sub>H<sub>36</sub>O<sub>2</sub> CAS: 57-11-4 MolWeight: 284 RefIndex: 2167  
 CompName: Octadecanoic acid  $\text{\$}$  Stearic acid  $\text{\$}$  n-Octadecanoic acid  $\text{\$}$  Hunko Industriene R  $\text{\$}$  Hydrofol Acid 150  $\text{\$}$  Hystrene S-97  $\text{\$}$  Hystrene T-70  $\text{\$}$  Hyr

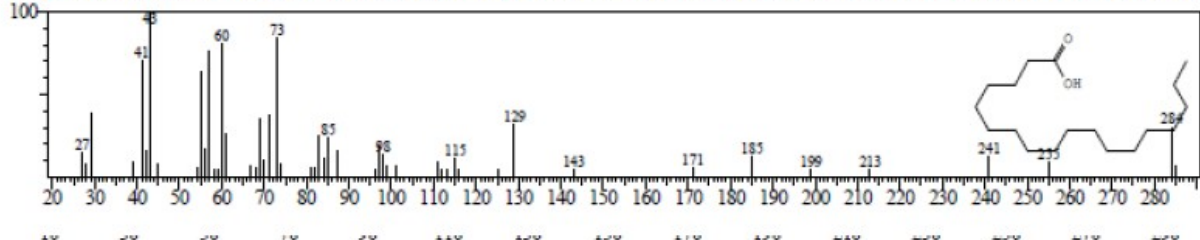

Hit# 1 Entry: 117519 Library: NIST05.LIB  
 SI: 79 Formula: C<sub>19</sub>H<sub>38</sub>O<sub>4</sub> CAS: 23470-00-0 MolWeight: 330 RefIndex: 2498  
 CompName: Hexadecanoic acid, 2-hydroxy-1-(hydroxymethyl)ethyl ester  $\text{\$}$  Palmitin, 2-mono-  $\text{\$}$  Palmitic acid, beta.-monoglyceride  $\text{\$}$  2-Hexadecanoyl glycer

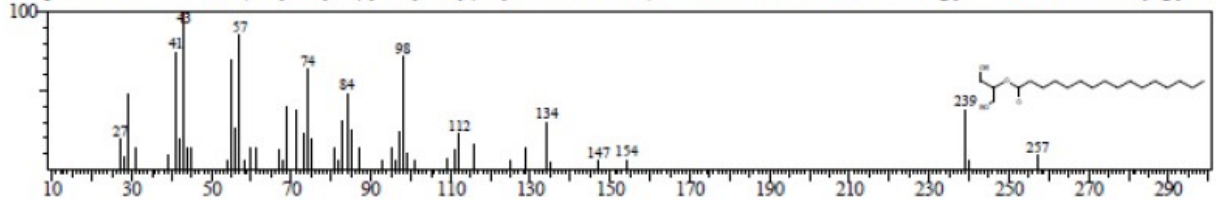

Figure S3: Mass spectra of the dyes.



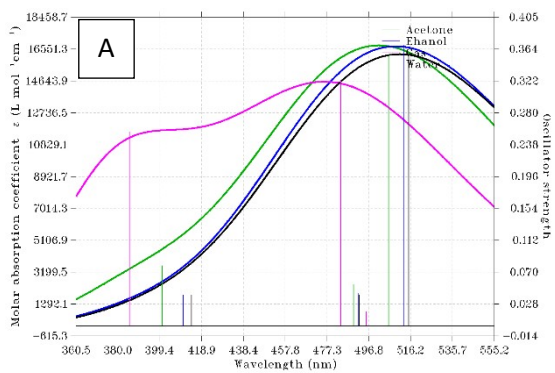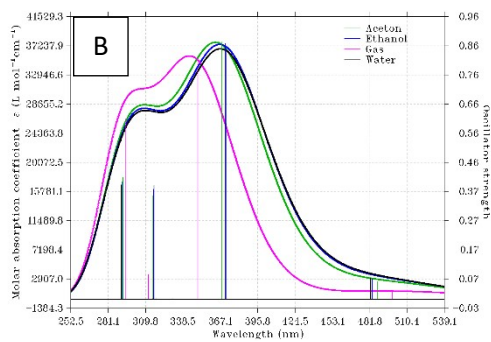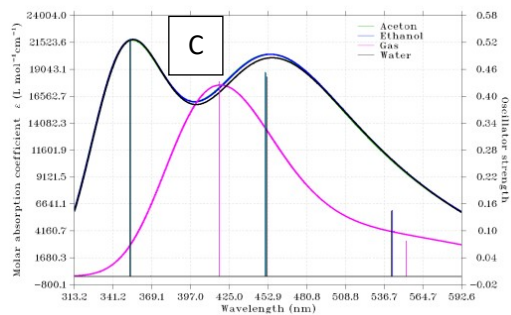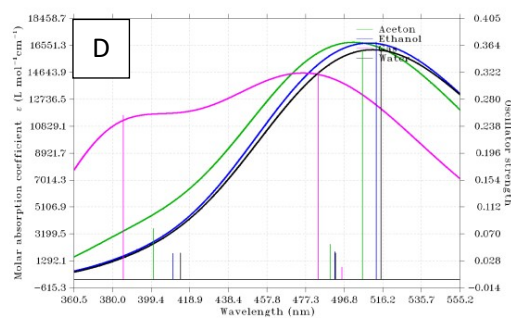

**Figure S4:** Graphical representation of the Theoretical UV-Vis absorption spectra of the optimized dyes in their different phases.

The Graphical representation of the Experimental UV-Vis absorption spectra of the optimized dyes in their different phases is as seen in S5 to S11

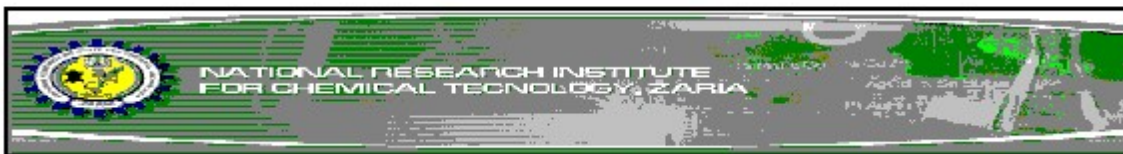

**NARICT, ZARIA UV-VISBLE SPECTRAL SCAN RESULT**

Spectrum Version:  
v2.30

07/23/2015

01:13:03 PM

RawData - C:\AZUAGA 4D ET.spc

| No. | P/V | Wavelength | Abs.  | Description |
|-----|-----|------------|-------|-------------|
| 1   | ⊕   | 630.60     | 0.050 |             |
| 2   | ⊕   | 591.00     | 0.056 |             |
| 3   | ⊕   | 576.20     | 0.058 |             |
| 4   | ⊕   | 564.60     | 0.057 |             |
| 5   | ⊕   | 359.80     | 0.127 |             |

Measurement Properties  
Wavelength Range (nm.): 350.00 to 700.00  
Scan Speed: Fast  
Sampling Interval: 0.2  
Auto Sampling Interval: Enabled  
Scan Mode: Auto

Instrument Properties  
Instrument Type: UV-2500PC Series  
Measuring Mode: Absorbance  
Slit Width: 2.0 nm  
Light Source Change Wavelength: 360.0 nm  
S/R Exchange: Normal

Attachment Properties  
Attachment: None

Sample Preparation Properties  
Weight: 1g  
Volume: 4ml  
Dilution: 1  
Path Length: 1  
Additional Information:

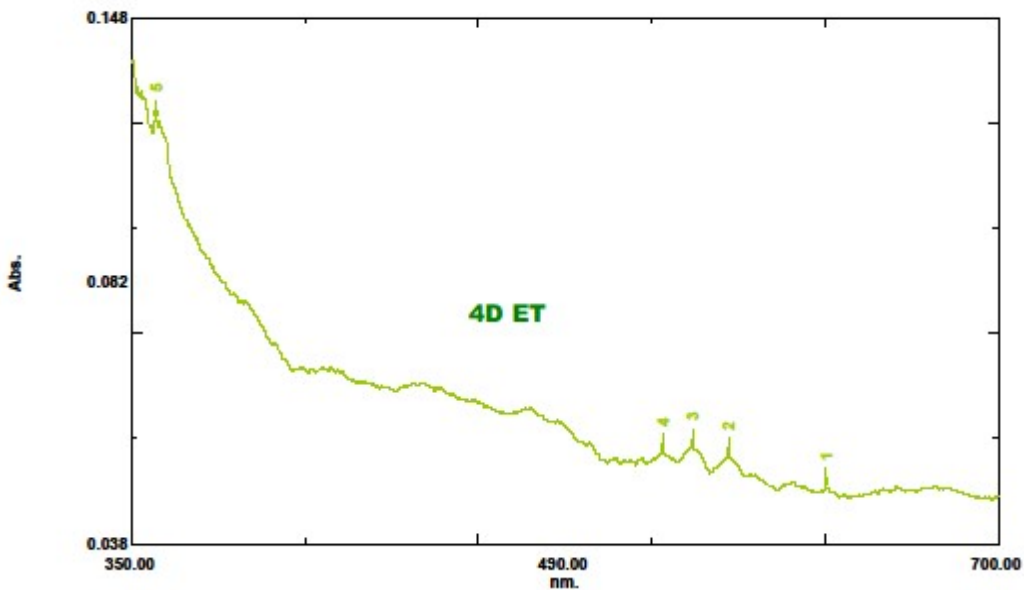

ANALYSIS VERIFIED BY NAME \_\_\_\_\_ SIGN \_\_\_\_\_ DATE \_\_\_\_\_

Figure S 5



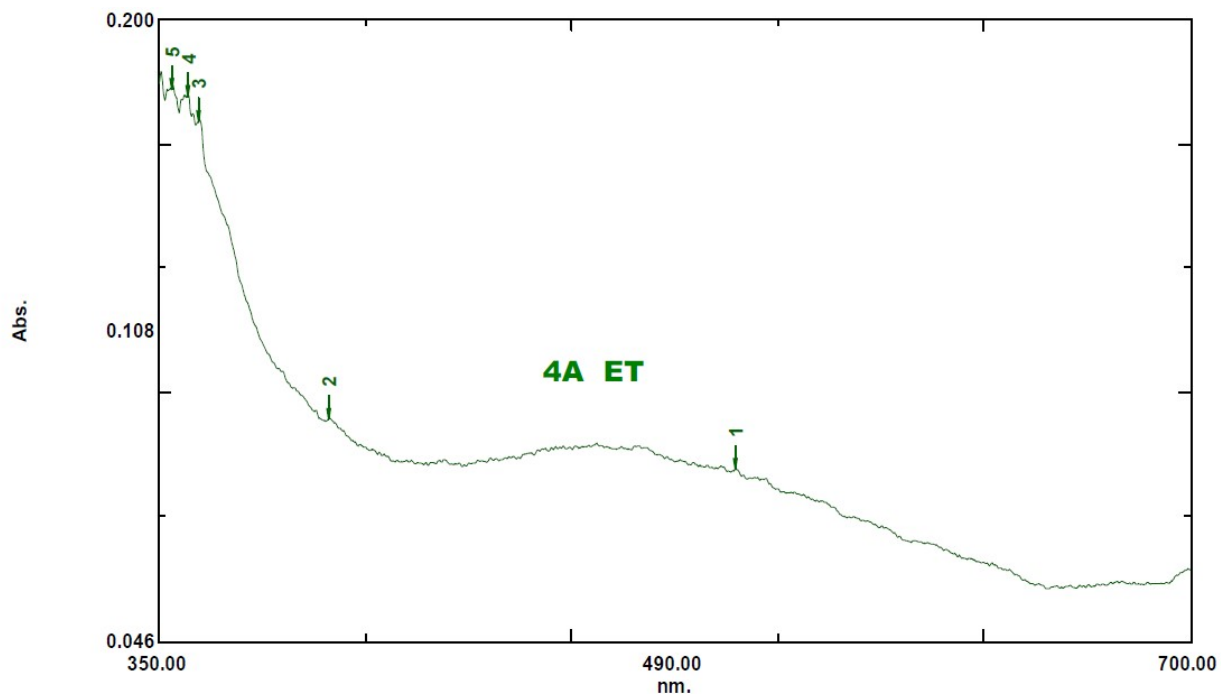

Figure S6:

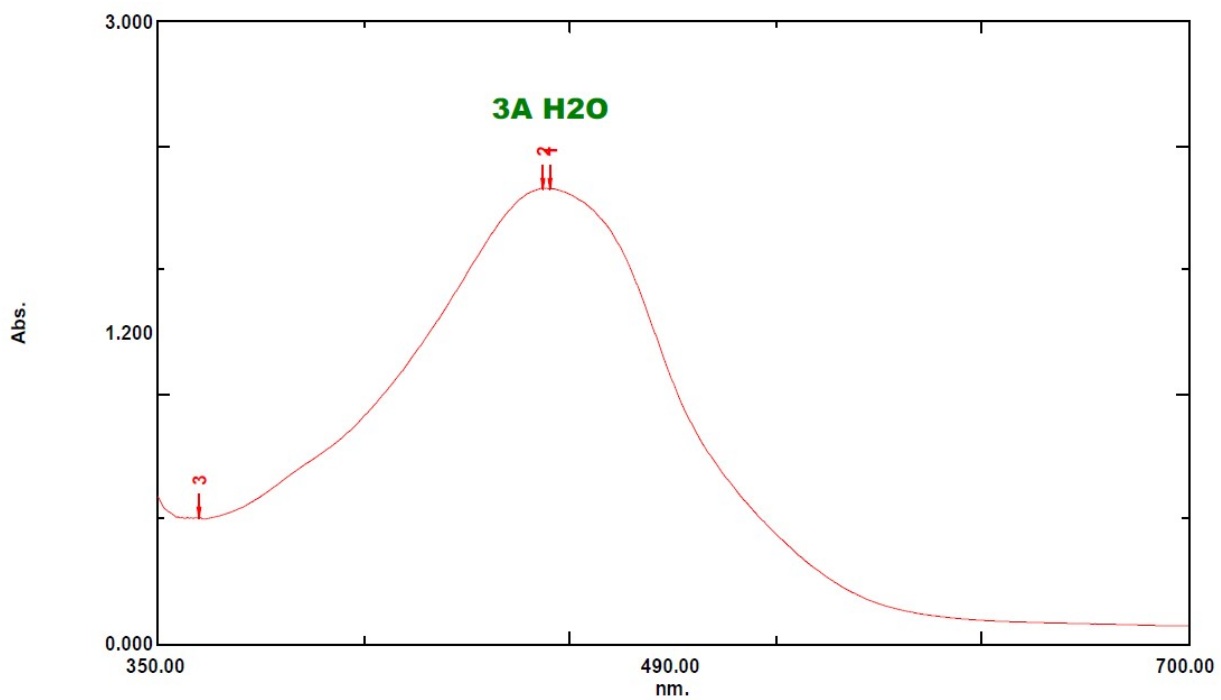

Figure S7

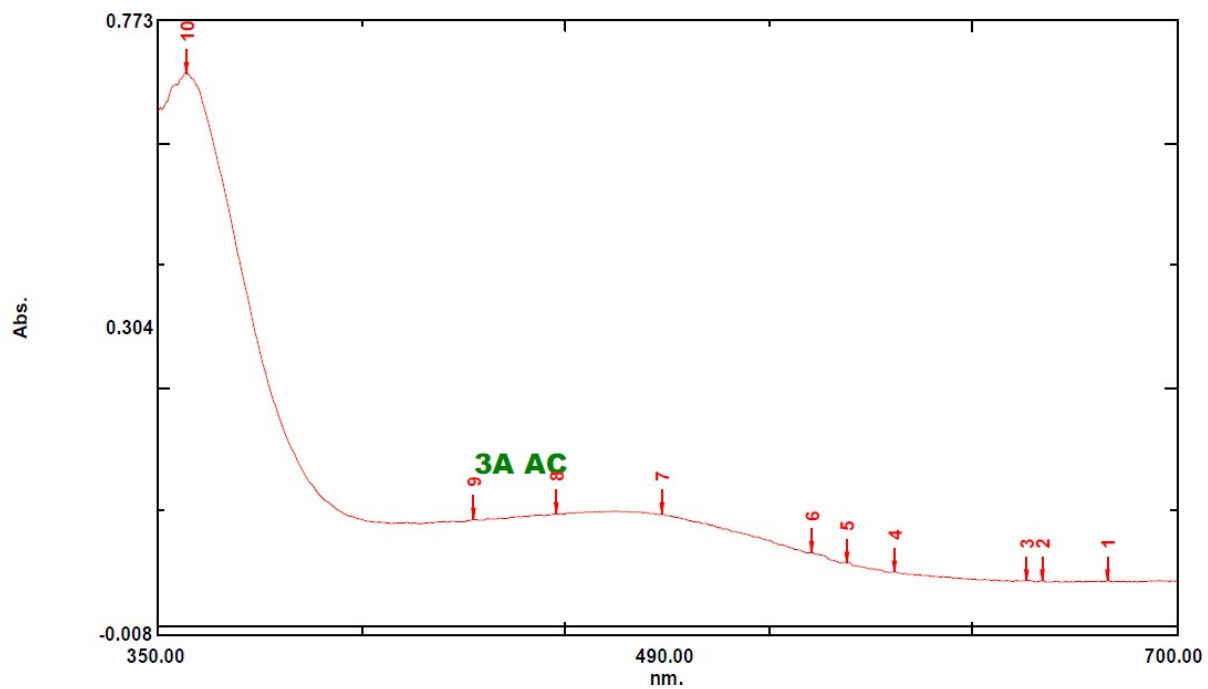

Figure S8

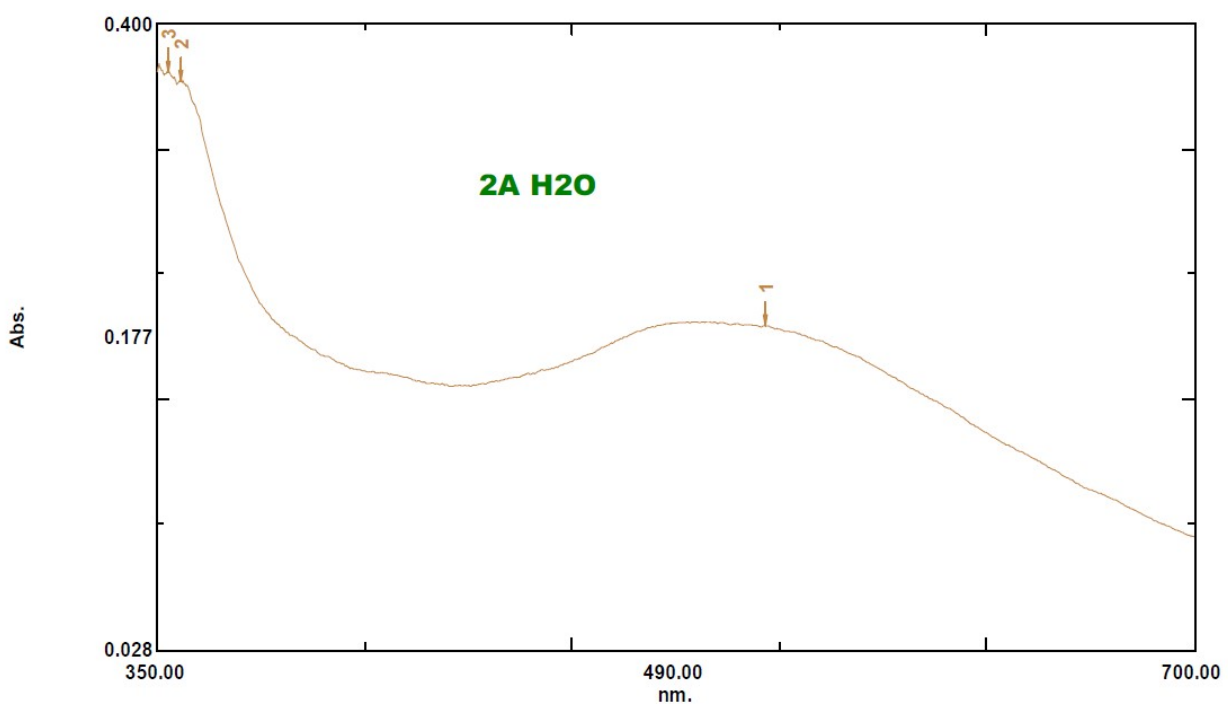

Figure S9

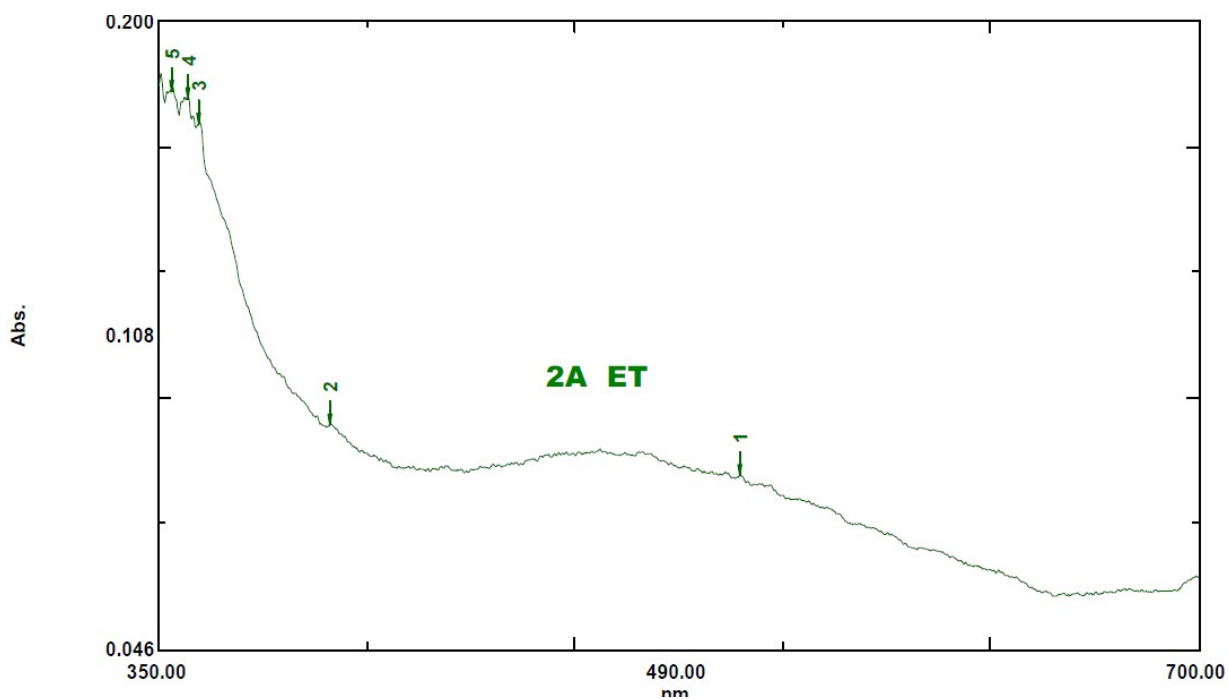

Figure S 10

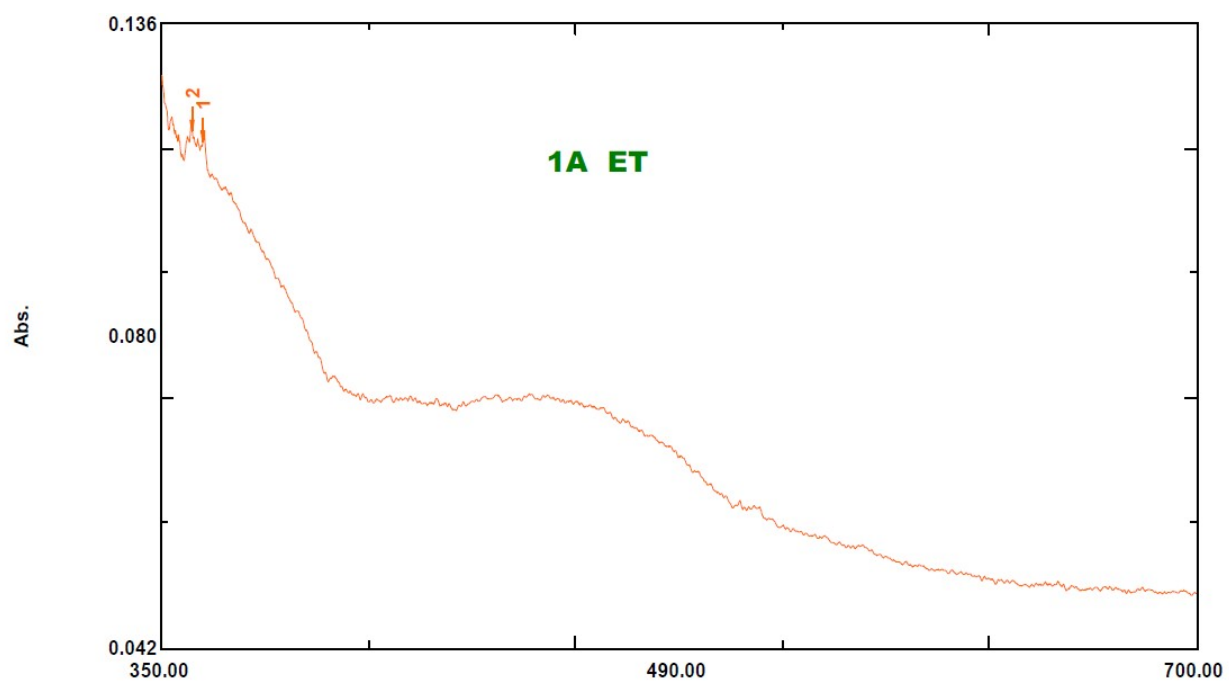

Figure S 11

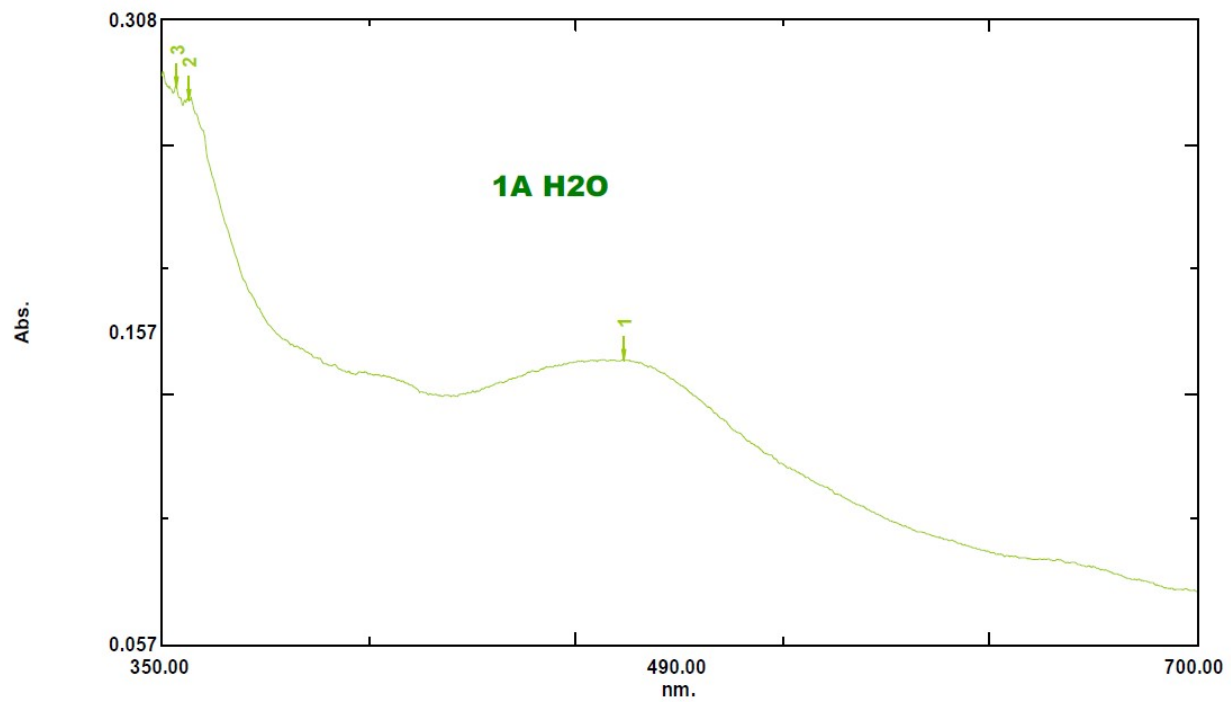

Figure S 12

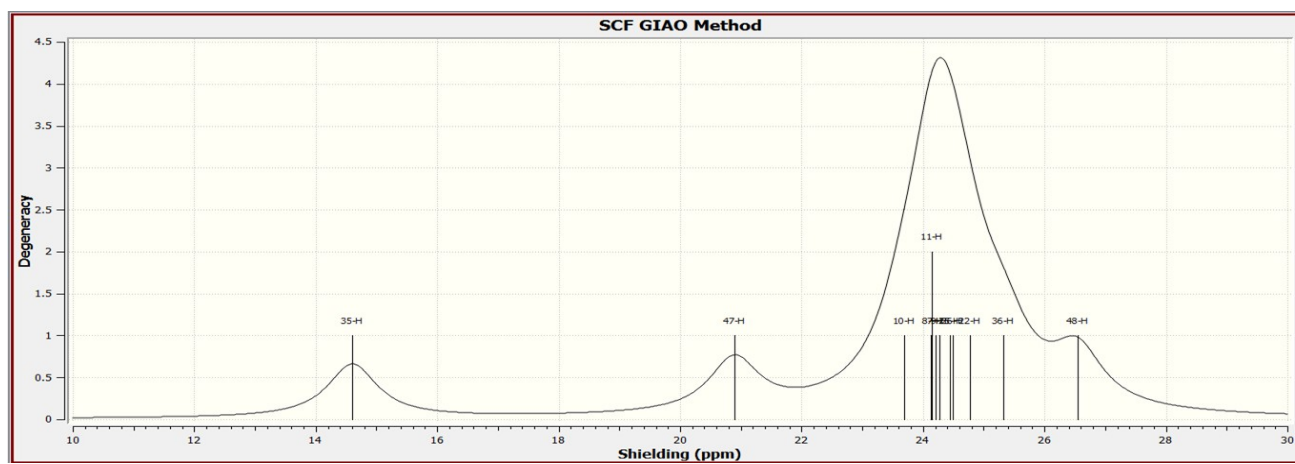

Figure S13: HNMR PLOT FOR DYE A.

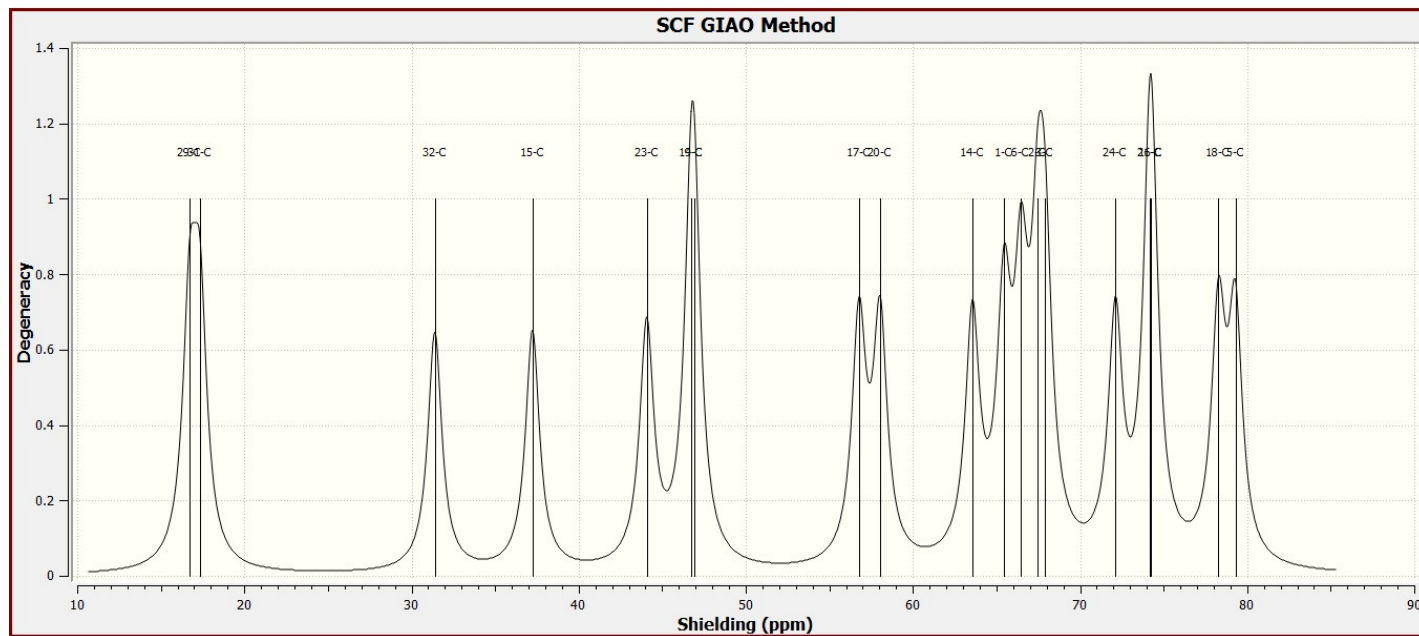

Figure S 14: CNMR PLOT FOR DYE A

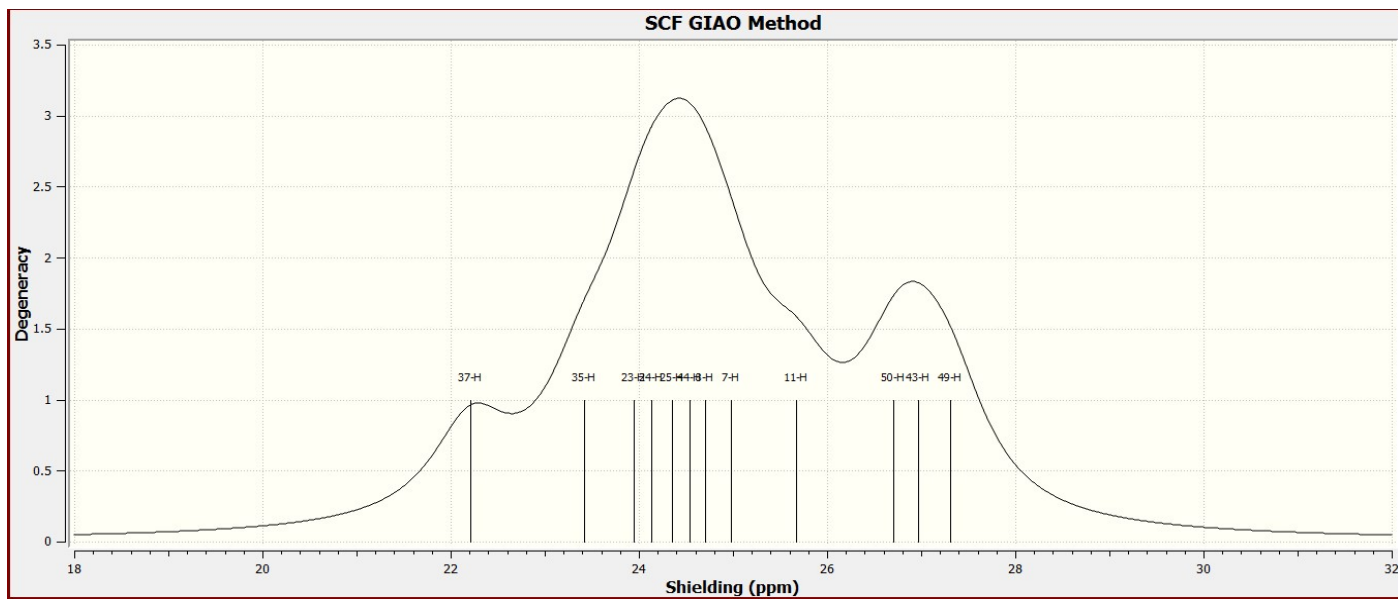

Figure S15 HNMR PLOT FOR DYE B

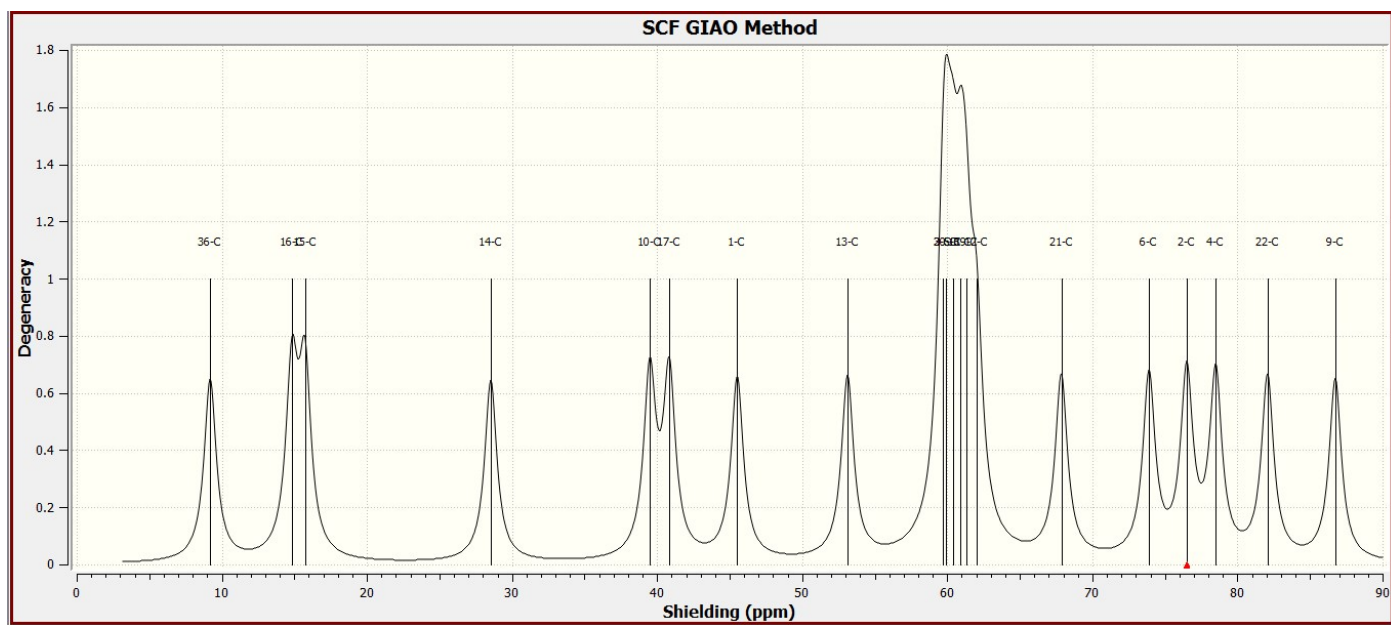

Figure S 16: CNMR PLOT FOR DYE B



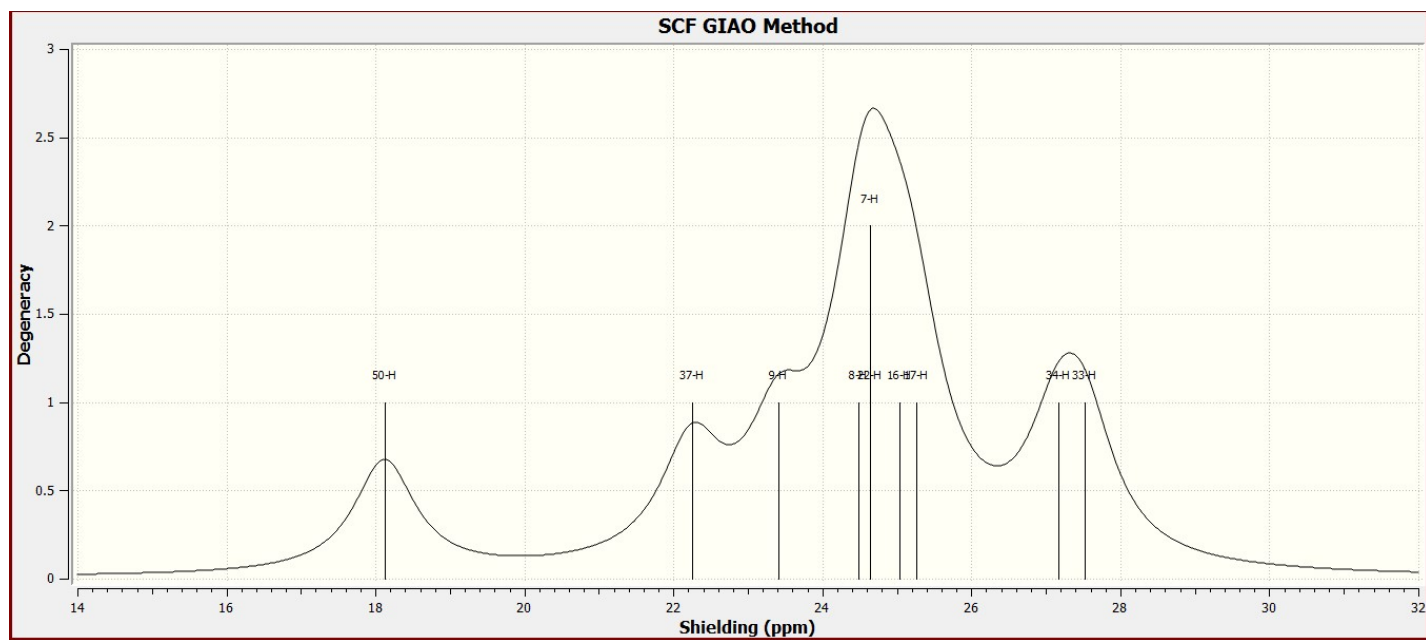

Figure S 17: HNMR PLOT FOR DYE C

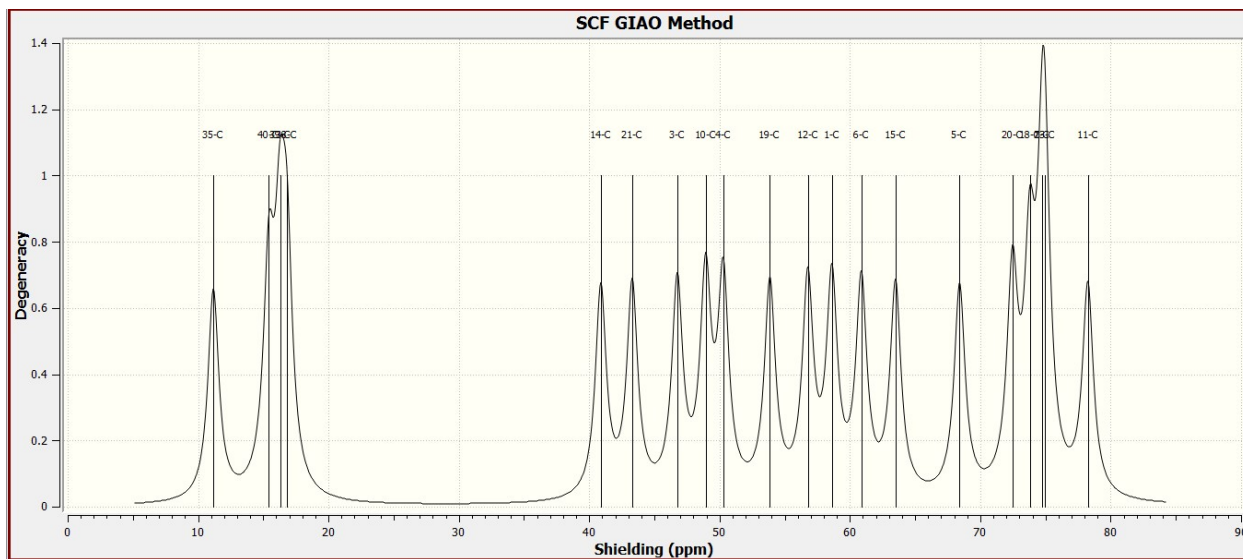

Figure S 18: CNMR PLOT FOR DYE C

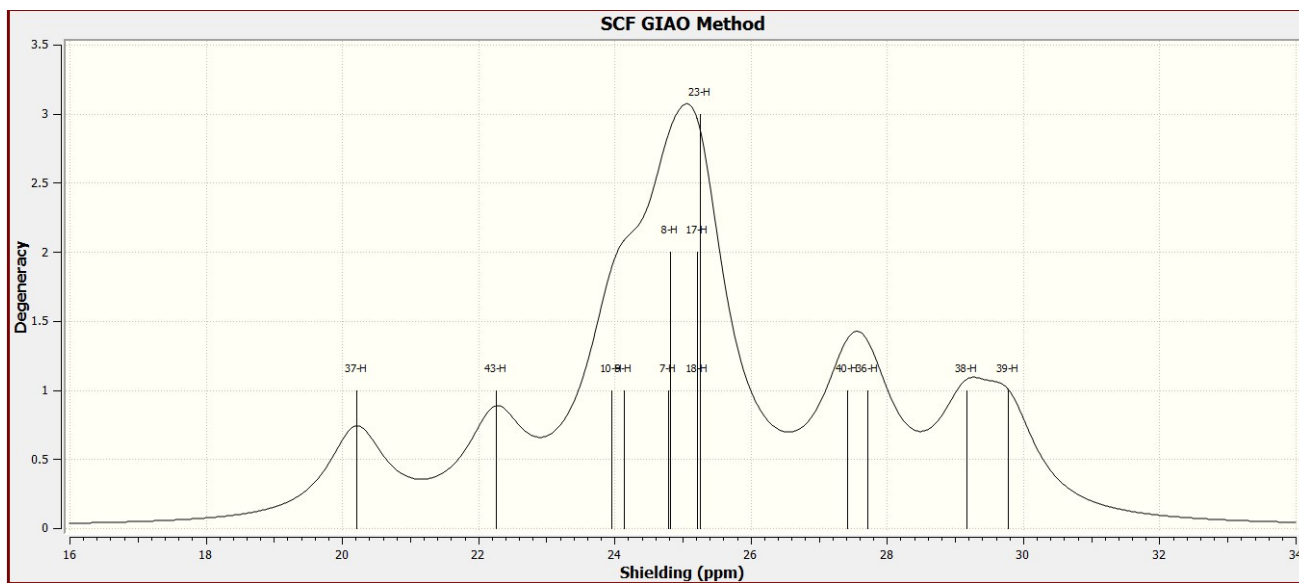

Figure S 19: HNMR PLOT FOR DYE D

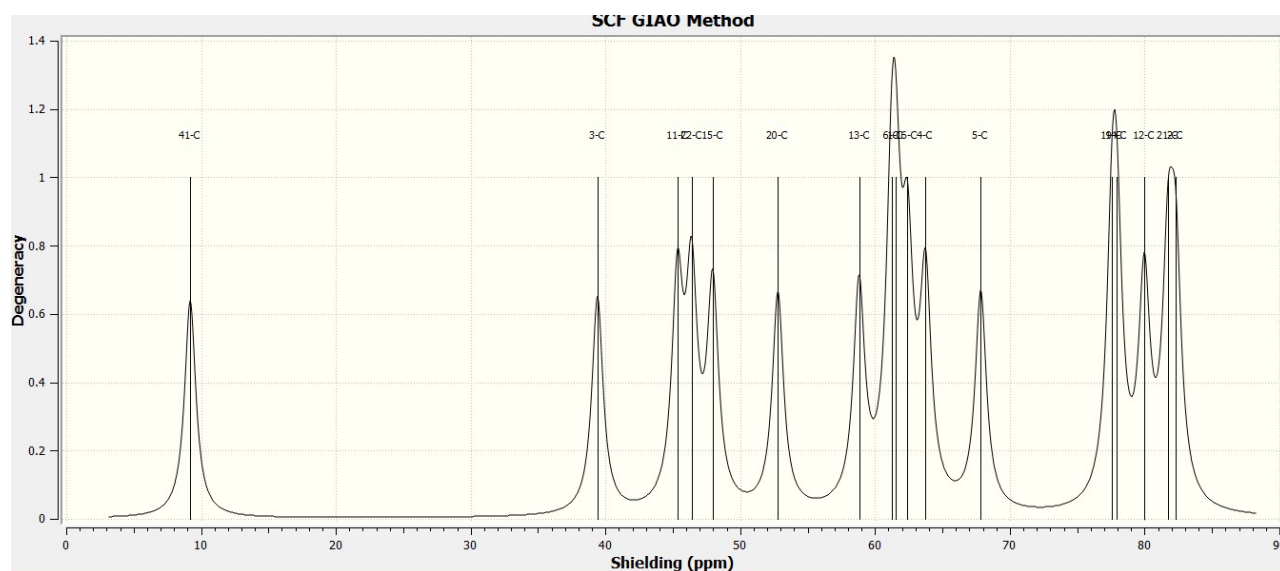

Figure S20: CNMR PLOT FOR DYE

Table S1: Second order perturbation for dye A

| S/N | Donor NBO (i)           | Acceptor NBO (j)          | E(2) kcal/mol | E(j)-E(i) a.u. | F(i,j) a.u. |
|-----|-------------------------|---------------------------|---------------|----------------|-------------|
| 1   | LP ( 1) C 14            | BD*( $\pi^*$ ) C18 - C19  | 51.07         | 0.17           | 0.100       |
| 2   | LP*( 1) C 17            | BD*( $\pi^*$ ) C18 - C19  | 48.83         | 0.15           | 0.096       |
|     | LP ( 1) N 28            | BD*( $\pi^*$ ) C32 - N33  | 67.53         | 0.24           | 0.118       |
| 4   | LP (1) N12              | LP*( 1) H35               | 82.73         | 0.56           | 0.209       |
| 5   | LP ( 3) O 27            | LP*(1) H 35               | 379.20        | 0.64           | 0.451       |
| 6   | BD ( $\pi$ ) C32 - N 33 | BD*( $\pi^*$ ) C29 - N 30 | 47.94         | 0.28           | 0.107       |

|    |              |                          |         |      |       |
|----|--------------|--------------------------|---------|------|-------|
| 7  | LP ( 1) C 14 | BD*( $\pi^*$ ) N12 - N13 | 127.60  | 0.07 | 0.100 |
| 8  | LP*( 1) C 15 | LP (1) C16               | 1726.93 | 0.01 | 0.131 |
| 9  | LP (2) O 27  | LP*(1) C15               | 87.43   | 0.18 | 0.136 |
| 10 | LP*( 1) C 17 | BD*( $\pi^*$ ) C21 - C23 | 60.95   | 0.13 | 0.101 |

**Table S2: Second order Perturbation for dye B**

| S/N | Donor NBO (i)               | Acceptor NBO (j)             | E(2) kcal/mol | E(j)-E(i) a.u. | F(i,j) a.u. |
|-----|-----------------------------|------------------------------|---------------|----------------|-------------|
| 1   | BD*( $\sigma^*$ ) O45 - S46 | BD*( $\sigma^*$ ) O42 - H43  | 19062.41      | 17.91          | 44.697      |
| 2   | BD ( $\sigma$ ) C19 - C20   | BD*( $\sigma^*$ ) C18 - C 19 | 58397.60      | 0.19           | 2.966       |
| 3   | LP (1) O38                  | BD*( $\sigma^*$ ) S 40 - O41 | 57407.44      | 0.30           | 3.760       |
| 4   | LP (1) O38                  | BD*( $\sigma^*$ ) O 39 - S40 | 28213.86      | 0.48           | 3.523       |
| 5   | LP (1) O38                  | BD*( $\sigma^*$ ) C 17 - C22 | 20960.83      | 0.27           | 2.150       |
| 6   | BD ( $\pi$ ) C19 - C20      | BD*( $\sigma^*$ ) C 36 - O38 | 53017.61      | 5.33           | 16.602      |
| 7   | LP (1) O42                  | BD*( $\sigma^*$ ) C 21 - C22 | 31414.11      | 2.22           | 7.470       |
| 8   | BD ( $\sigma^*$ ) C19 - C20 | BD*( $\sigma^*$ ) C 19 - H44 | 64601.60      | 0.22           | 3.399       |
| 9   | LP (2) O42                  | BD*( $\pi^*$ ) C 5 - C 6     | 25673.95      | 0.01           | 0.524       |
| 10  | LP (1) S40                  | BD*( $\sigma^*$ ) C 21 - C22 | 19268.56      | 5.58           | 9.266       |

**Table S3: Second order perturbation for dye C**

| S/N | Donor NBO (i)             | Acceptor NBO (j)          | E(2) kcal/mol | E(j)-E(i) a.u. | F(i,j) a.u. |
|-----|---------------------------|---------------------------|---------------|----------------|-------------|
| 1   | LP*(1) C3                 | LP (1) C2                 | 2127.87       | 0.01           | 0.139       |
| 2   | LP*(1) C14                | LP (1) C13                | 1819.82       | 0.01           | 0.131       |
| 3   | BD*( $\pi^*$ ) C39 - N 43 | BD*( $\pi^*$ ) C38 - N 44 | 247.03        | 0.01           | 0.080       |
| 4   | LP*(1) C12                | BD*( $\pi^*$ ) C18 - C 21 | 60.52         | 0.13           | 0.101       |
| 5   | BD ( $\pi$ )C38 - N44     | BD*( $\pi^*$ ) C40 - N 45 | 389.62        | 0.63           | 0.452       |
| 6   | LP (1) C15                | BD*( $\pi^*$ ) N29 - N 30 | 110.44        | 0.09           | 0.103       |
| 7   | LP (1) C2                 | BD*( $\pi^*$ ) C1 - C6    | 75.12         | 0.14           | 0.111       |
| S8  | LP (3) O48                | BD*( $\pi^*$ ) N46 - O47  | 161.96        | 0.15           | 0.141       |
| 9   | BD*( $\pi^*$ ) C40 - N45  | BD*( $\pi^*$ )C38 - N 44  | 160.94        | 0.02           | 0.077       |
| 10  | LP (2) O49                | LP*( 1) C 14              | 85.91         | 0.18           | 0.136       |

**Table S4: Second order perturbation for dye D**

| S/N | Donor NBO (i)            | Acceptor NBO (j)           | E(2) kcal/mol | E(j)-E(i) a.u. | F(i,j) a.u. |
|-----|--------------------------|----------------------------|---------------|----------------|-------------|
| 1   | LP ( 1) C 14             | LP*( 1) C 13               | 1747.32       | 0.01           | 0.132       |
| 2   | BD*( $\pi^*$ ) 15 - C 16 | BD*( $\pi^*$ ) C 11 - C 12 | 164.11        | 0.01           | 0.075       |
| 3   | BD*( $\pi^*$ ) N31 - N32 | BD*( $\pi^*$ ) C 15 - C 16 | 72.67         | 0.02           | 0.066       |
| 4   | LP (1) C 14              | BD*( $\pi^*$ ) C 20 - C 21 | 68.86         | 0.14           | 0.104       |
| 5   | LP (1) C 14              | BD*( $\pi^*$ ) C 15 - C 16 | 68.69         | 0.14           | 0.103       |
| 6   | LP (1) C 6               | BD*( $\pi^*$ ) C 1 - C 2   | 63.69         | 0.14           | 0.105       |
| 7   | LP ( 1) C6               | BD*( $\pi^*$ ) C 4 - C 5   | 60.64         | 0.15           | 0.104       |
| 8   | LP (1) C6                | BD*( $\pi^*$ ) C 41 - O 42 | 59.26         | 0.12           | 0.101       |

|    |            |                          |       |      |       |
|----|------------|--------------------------|-------|------|-------|
| 9  | LP*(1) C3  | BD*( $\pi^*$ ) C 1 - C 2 | 58.67 | 0.14 | 0.103 |
| 10 | LP*( 1) C3 | BD*( $\pi^*$ ) C 4 - C 5 | 55.14 | 0.15 | 0.102 |

---
